# 1 Adolescent choices and caregiver roles: Understanding 2 individual and interpersonal influences on sexual decision- 3 making in South Africa

4  
5 **Short title: Adolescent choices and caregiver roles in adolescent sexual decision-making**

6  
7 **Authors: Heeran Makkan**<sup>1,2\*</sup>, Yvonne Wangui Machira<sup>3</sup>, Funeka Mthembu<sup>1</sup>, Omphile  
8 Masibi<sup>1</sup>, Thuso Molefe<sup>1#</sup>, Pholo Maenetje<sup>1,4</sup>, Vincent Muturi-Kioi<sup>3</sup>, Matt A. Price<sup>3,5</sup>, Vinodh  
9 Aroon Edward<sup>1,2,4,6</sup>, Candice Chetty-Makkan<sup>1#,7,8</sup>

10

## 11 **Affiliations:**

12 <sup>1</sup> The Aurum Institute, Rustenburg Research Centre, Rustenburg, North-west Province, South  
13 Africa

14 <sup>2</sup> Department of Interdisciplinary Social Science, Public Health, Utrecht University, Utrecht,  
15 The Netherlands

16 <sup>3</sup> IAVI Africa, Nairobi, Kenya

17 <sup>4</sup> Department of Medicine, Vanderbilt University, Nashville, Tennessee, United States

18 <sup>5</sup> Department of Epidemiology and Biostatistics, University of California, San Francisco, San  
19 Francisco, USA

20 <sup>6</sup> School of Health Sciences, College of Health Sciences, Westville Campus, University of  
21 KwaZulu-Natal, Durban, South Africa

22 <sup>7</sup> Health Economics and Epidemiology Research Office (HE<sup>2</sup>RO), Wits Health Consortium,  
23 Johannesburg, South Africa

24 <sup>8</sup> Faculty of Health Sciences, University of Witwatersrand, Johannesburg, South Africa

NOTE: This preprint reports new research that has not been certified by peer review and should not be used to guide clinical practice.

25 # Affiliation at the time of study concept

26

27 \* **Corresponding Author:** Heeran Makkan, MSc.

28 Current Address: The Aurum Institute, Aurum House, The Ridge, 29 Queens Road,

29 Parktown, Johannesburg, 2193

30 Telephone: +27 (0) 10 590 1331

31 Email: [hmakkan@auruminstitute.org](mailto:hmakkan@auruminstitute.org)

32 ORCID number: 0000-0002-4737-7804

33

## 34 **Abstract**

35 South African adolescents are at-risk for HIV infection. Understanding the factors  
36 influencing sexual decision-making is crucial for developing effective HIV prevention  
37 strategies. We conducted a qualitative study with adolescents and caregivers in Rustenburg,  
38 South Africa to explore individual and interpersonal factors that influence adolescent sexual  
39 decision-making. Focus Group Discussions (FGDs) were conducted in English and Setswana  
40 with 17 adolescents (13 females and 4 males) and 19 caregivers (17 females and 2 males)  
41 between April and July 2018. Thematic analysis revealed that while adolescents had access to  
42 sexual education from various sources, where the knowledge does not translate into healthy  
43 sexual decision-making. A contributing barrier was the lack of effective communication and  
44 support between caregivers and adolescents in discussing topics related to sexual activity.  
45 Although adolescents expressed a strong need to be understood and supported by caregivers  
46 regarding their sexual activity, there was perceived distrust, judgemental attitude from  
47 caregivers, poor role models of a father figure, and the traditional taboo of having these  
48 discussions with caregivers. While female adolescents and female caregivers discussed  
49 sensitive matters, this type of communication was limited with adolescent males. Male

50 adolescents were uncomfortable communicating with either caregiver, fearing caregiver  
51 judgemental attitudes and being misunderstood. Female caregivers perceived male caregiver  
52 roles to be absent and non-engaging when it came to adolescent education and support in  
53 sexual matters. Caregivers desired to support their children, yet they seemed to doubt their  
54 skills. Communication tools and guidance on how adolescents and caregivers could  
55 communicate about sensitive matters could create enabling environments for adolescents to  
56 make informed, healthy decisions regarding their risky sexual behaviours. To address  
57 adolescent intention-behaviour gap, future interventions could consider gain-framed  
58 messaging within intervention packages to promote healthy sexual choices.

59

60 **Abstract word count** = 282 words

61

## 62 **List of Keywords:**

63 Communication, caregiver-adolescent relationship, sexual education, adolescent decision-  
64 making, adolescent choices, HIV, caregiver support, male caregiver or fatherly role, South  
65 Africa, gain-framed messaging, intention-behaviour gap

66

## 67 **Authors' contributions:**

68 Conceptualization: Heeran Makkan and Candice Chetty-Makkan.

69 Methodology: Heeran Makkan, Funeka Mthembu, Pholo Maenetje, Candice Chetty-Makkan  
70 and Matt A. Price.

71 Formal analysis and investigation: Heeran Makkan, Yvonne W. Machira and Candice  
72 Chetty-Makkan.

73 Writing – original draft: Heeran Makkan, Yvonne W. Machira , Matt A. Price, Vinodh A.  
74 Edward and Candice Chetty-Makkan.  
75 Writing – review and editing: Heeran Makkan, Funeka Mthembu, Omphile Masibi, Thuso  
76 Molefe, Pholo Maenetje, Vincent Muturi-Kioi, Matt A. Price, Yvonne W. Machira, Vinodh  
77 A. Edward, and Candice Chetty-Makkan.  
78 Funding acquisition: Pholo Maenetje.  
79 Resources: Pholo Maenetje and Funeka Mthembu.  
80 Supervision: Vinodh A. Edward.

81

82 **Manuscript Word Count** = 3583 words

83

## 84 **Introduction**

85

86 The HIV burden among sub-Saharan African (SSA) adolescents is a significant public health  
87 concern with adolescent girls and young women (AGYW) aged 15-24 years accounting for  
88 63% of new HIV infections in the region (1). In South Africa, AGYW are particularly  
89 vulnerable having an HIV acquisition rate three times higher than their male counterparts (2).  
90 This vulnerability is exacerbated by various factors including sexual relationships with older  
91 men, gender inequalities, social norm discriminatory practice, poverty, deprived autonomy,  
92 and risk for abuse and violence (3–5). Although adolescent boys and young men (ABYM) are  
93 at lower risk for HIV acquisition, there is a growing need to include ABYM in HIV  
94 prevention discussions (1,4). Therefore, it remains vital to understand both AGYW and  
95 ABYM perspectives regarding their sexual decision-making and risk for HIV (1,4,6).

96

97 In South Africa, several studies have been conducted with adolescents to understand  
98 participant preferences for HIV prevention modalities (7–10). Many studies have focused on  
99 identifying barriers, motivators, and preferences to improve the uptake and persistent use of  
100 HIV prevention modalities, which are usually designed without including the voices of  
101 adolescents (7,8). This important step of including adolescents from the onset during the co-  
102 design phase of HIV prevention interventions is essential, yet often overlooked.

103

104 Importantly, in South Africa and elsewhere in SSA, engagement with caregivers (parents or  
105 guardians) is also rare when it concerns adolescent sexual decision-making (11–13).  
106 Although caregivers are uniquely positioned to educate and counsel their adolescents on how  
107 to make healthy sexual decisions only 20% of South African adolescents receive sexual  
108 health education from their caregivers (13,14). The role of discussing sensitive matters with  
109 adolescents generally becomes the responsibility of the female caregivers, as male caregivers  
110 are generally perceived as being absent, difficult, uncomfortable, and incapable of fostering  
111 close bonds with children (13,14). Although there are benefits of improving the adolescent-  
112 caregiver communication to promote informed decision-making in adolescent sexual  
113 behaviours, cultural barriers, long work hours, and limited knowledge and experience in  
114 reaching their children further impede the communication between adolescents and their  
115 caregivers (11–14).

116

117 The socioecological model (SEM) provides a framework for understanding the multiple  
118 levels of interactions that could influence adolescent sexual decision-making (15–18).  
119 Applying the SEM to explore the perspectives of adolescents and others in their social  
120 ecology can provide valuable insights into the complex interplay of factors shaping  
121 adolescent sexual decision-making (16,18,19). While there are several studies on adolescent

122 sexual behaviour and behavioural interventions, there is a dearth of information on  
123 understanding the underlying individual and interpersonal factors which influence healthy  
124 decision-making among adolescents (16,18,19). Although several intervention strategies were  
125 identified from past studies, limited studies explore how the role of caregivers could  
126 influence adolescent's ability to make healthy sexual decisions (19). Therefore, we conducted  
127 a qualitative exploratory study to understand the factors that influences sexual decision-  
128 making from the perspectives of adolescents and their caregivers.

129

## 130 **Methods**

131

### 132 **Study design and setting**

133

134 This qualitative project was embedded in a parent observational prospective study that took  
135 place at the Aurum Rustenburg Research Centre, South Africa. Rustenburg is one of the  
136 fastest growing cities in the Northwest Province with an approximate population of 562,031,  
137 where platinum mining is the dominant industry (20). Adolescents between the ages of 12-19  
138 years constitute 14.6% of the population and have a high prevalence of HIV (2,21,22).

139

140 The main parent study has been previously reported (23), where we recruited males and  
141 females aged between 12 to 19 years, who were HIV-negative and in females not pregnant.  
142 The parent study aimed to evaluate adolescent preparedness for HIV prevention trials, assess  
143 clinical trial knowledge, measure willingness to participate in HIV prevention research, and  
144 characterize adolescent HIV risk and sexual decision-making. Among the parent study  
145 participants, adolescents, and their caregivers (parent or guardian) were invited through to

146 take part in focus group discussions (FGD). FGDs were conducted within three months after  
147 enrolling into the main study, between April to July 2018. Adolescents and caregivers were  
148 selected using convenience sampling, considering their availability for a scheduled date  
149 within the 3-month window, and concluded once a quota of 8 to 10 participants were reached.

150

## 151 **Data Collection**

152 Two in-person FGDs were conducted with adolescents and two with caregivers following  
153 enrolment into the main study and before a month-3 follow-up visit. Each FGD comprised 8-  
154 10 participants. The adolescent FGDs were disaggregated by age only (15-17 years and 18-19  
155 years). Caregiver FGDs included those who took care of or supervised adolescents between  
156 15-17 years. FGDs were conducted in English and Setswana (the predominant local language  
157 in Rustenburg) and took approximately one hour.

158

159 FGD guides (attached S1 and S2) were used to explore the adolescent and caregiver  
160 knowledge of sexual and reproductive health, and factors contributing to sexual and  
161 reproductive health behaviour. The guides included topics to understand where adolescents  
162 accessed sexual and reproductive health education, individual and interpersonal influences on  
163 adolescent sexual and reproductive health decisions, perceptions of the age adolescents could  
164 become or decide to be sexually active, and recommendations which could encourage  
165 adolescents to speak honestly about their sexual behaviours. Research assistants OM and TM  
166 (graduate education), female and male respectively, were the facilitators and note takers.  
167 They were trained by an experienced post-doctoral investigator (CCM) before data collection.  
168 During each FGD, CCM or FM added in facilitation in a supervisory role to facilitators OM  
169 and TM. Facilitators and note takers (OM, TM, FM and CCM) had professional relationships  
170 with participants and their caregivers, which ended post the main study conclusion.

171

172 During screening into the main study, adolescents completed an interviewer-administered  
173 socio-demographic and sexual behaviour questionnaire. Caregivers completed an abbreviated  
174 interviewer administered socio-demographic questionnaire only. We used data from the  
175 socio-demographic questionnaires to describe our participant pool for this study.

176

## 177 **Data Analysis**

178 All FGDs were digitally-recorded, transcribed verbatim and translated to English (where  
179 necessary) prior to analysis by OM and TM. Following each FGD and after the debrief  
180 sessions, the digital recordings were reviewed to revise the probes and monitor the saturation  
181 of themes. FM conducted a quality check of the transcripts. De-identified English transcripts  
182 and debrief notes were also reviewed before data analysis and included in the codebook.  
183 NVIVO software Version 14 was used for the analysis (24). For the analysis, HM used a  
184 thematic approach that included deductive and inductive approaches to derive the themes.  
185 Through inter-rater reliability (YWM and CCM), we reached an agreement on the coding and  
186 emerging patterns. Discrepant codes were dropped during the analysis. Emerging themes  
187 were further discussed and finalised during virtual meeting discussions with the research  
188 team. We applied a 32-item checklist (attached S3), the Consolidated Criteria for Reporting  
189 Qualitative Research (COREQ), to ensure comprehensive reporting of qualitative data (25).

190

## 191 **Ethical Review**

192 The study was approved by the University of the Witwatersrand, Human Research Ethics  
193 Committee (ref. no 170607), and the Research Committee of the Northwest Provincial



194 Department of Health. All participants were reimbursed ZAR150.00 (about \$8.20 USD) for  
195 participation in the FGDs.

196

197 Adolescents who were between 18-19 years provided written informed consent, and we  
198 obtained written assent from those younger than 18 years along with written caregiver  
199 consent. Caregivers consented to take part in the FGDs. All participants provided consent for  
200 the FGDs to be digitally recorded. Illiterate participants provided a thumbprint to  
201 acknowledge understanding in the presence of a witness. Participants consented to their direct  
202 quotations being published.

203

## 204 **Results**

205

### 206 **Descriptive characteristics of participants**

207 Seventeen adolescents (13 females and 4 males) participated in the FGDs, with median age  
208 17-years (Interquartile range (IQR) 16-18 years). Most adolescents (n=13) attended senior  
209 secondary school. Nine females and one male reported being in a relationship with a steady  
210 partner/s, where only the females reported being sexually active. Five (55.6%) of these nine  
211 females reported multiple heterosexual sexual relationships with older partners up to four  
212 years older than them. Sixteen (94.1%) adolescents reported alcohol use, at a minimum once  
213 per month.

214

215 Seventeen female and 2 male caregivers with a median age of 37 years (IQR 34-46 years)  
216 took part in the FGDs. Thirteen were unemployed, with twelve reliant on family or  
217 spouse/partner financial assistance. All caregivers had about 2 to 5 child dependents per  
218 household. Among the 17 female caregivers, seven were married, and seven were in a steady

219 non-cohabitating relationship. Thirteen caregivers had their first child before they were 21  
 220 years old (range 16-20 years old), all females.

221

## 222 **Qualitative findings**

223 Table 1 lists the themes aligned with the individual and interpersonal levels from the SEM.

224

225 Table 1. Emerging themes that influence adolescent sexual decision-making from adolescent  
 226 and caregiver perspectives in Rustenburg, South Africa.

| Social Ecology Level                                          | Themes                                                                          | Description                                                                                                                                                                                                                                                                    |
|---------------------------------------------------------------|---------------------------------------------------------------------------------|--------------------------------------------------------------------------------------------------------------------------------------------------------------------------------------------------------------------------------------------------------------------------------|
| Individual level factors influencing sexual decision-making   | Gaps in theoretical knowledge and actual behaviour                              | Theoretical knowledge source is from school curriculum (educators), friends, digital media, social media, television, and radio; Adolescents know of sexual risk-behaviours and methods to prevent negative outcomes yet continue to engage in risky-sexual behaviours.        |
|                                                               | Age milestone informed ability to become sexually active                        | Reaching adulthood, puberty, body development and traditional beliefs are factors contributing to the perception when an adolescent may become sexually active                                                                                                                 |
|                                                               | Alcohol consumption rendering adolescents prone to high-risk sexual activities  | Adolescents often consume alcohol when engaging in "fun" activities and lose their inhibition - resulting in high-risk sexual behaviour, and sexual and violent abuse                                                                                                          |
| Relationship level factors influencing sexual decision-making | Caregiver roles in educating and counselling adolescents about sexual behaviour | Caregivers and adolescents have comfort in discussing sex topics with a person of the same gender. Female caregivers are often left to play this supportive role either in single mother or duo caregiver homes.                                                               |
|                                                               | Importance of the male caregiver figure                                         | Male caregivers are needed to have an active role in the upbringing of their children, especially to when discussing sex topics with a male adolescent. Male caregivers in contrast felt they could not perform this function as their sons were much closer to their mothers. |

Caregiver and adolescent perceptions of communication barriers

Both adolescents and caregivers indicated barriers in communication to be judgemental attitudes, distrust, lack of experience and skill, and traditional taboo nature in engaging in sex discussions with children or caregivers.

---

227

## 228 **Individual level factors influencing sexual decision-making**

229 Adolescents received information on sexual behaviour and how to make sexual decisions  
230 from school, friends, partners, television and social media that were confirmed in responses  
231 from the caregivers.

232 *“...sexting whereby you text your partner, talking about those things...I learned mostly about*  
233 *these things at school and from friends when they tell you that they saw this and that on TV*  
234 *and also from cellphones [smart phone device] and Facebook.” Female, 15-17 years old, not*  
235 *sexually active.*

236

237 *“Social media influences us because on Facebook you see other children who are*  
238 *younger than you posting naked pictures of themselves then you ask yourself why are*  
239 *you not posting naked pictures of yourself when you older than them...So that*  
240 *influences you to grow up.” Male, 15-17 years old, not sexually active.*

241

242 *“On the TV a lot of the times we see...they watch sexual movies on the TV right. So*  
243 *that’s the thing that encourages them to end up being a part of that thing”. Female*  
244 *caregiver, 31-35 years old, single with steady partner.*

245

246 However, adolescents and caregivers perceived that there is a gap in translating the  
247 knowledge of sexual behaviour into healthy sexual decisions that limit the risk of HIV  
248 infection or pregnancy.

249

250 *“They know about risky behaviour... It is just that they are hard-headed”.*

251 Female, 18-19 years old, sexually active, single with multiple partners.

252

253 *“I don’t think that all adolescents know because if they knew they wouldn’t engage in*  
254 *unprotected sex...become pregnant when they are young, they are getting HIV...”.*

255 Male caregiver, 46-50 years old, married.

256

257 Reaching a certain age milestone informed adolescent decision-making on sexual activity.

258 Adolescents had polarized views though, where some preferred younger age associating this  
259 with the onset of puberty while others preferred waiting until adulthood.

260 *“15 years because a lot of things would have changed on your body, like the eggs in a*  
261 *women’s’ body.”*, Male, 15-17 years old, not sexually active, no partner.

262

263 *“I think at 12 because at 12 you starting to be matured. For puberty starting.”*

264 Female, 18-19 years old, sexually active, and has a single partner.

265

266 *“...a person should start having sex at the age of 21, because 21 you are mature*  
267 *enough, you are able to take right decisions when coming to sex.”* Female, 18-19  
268 years old, sexually active, single partner.

269

270 Alcohol use was perceived to promote engagement in high-risk sexual activity, voluntarily  
271 and involuntarily, reducing the ability to make informed healthy decisions.

272 “Risky behaviour according to my understanding, is like when we go out with friends  
273 and have fun and start behaving in a way that we start drinking and not seeing the  
274 outcomes....” Female, 18-19 years old, sexually active, multiple partner relationship.

275  
276 “...some girls...while they are sitting there at the taverns with the guys, the girl would  
277 go to the toilet and the other guys will put a drug in the girls drink. Then the girl  
278 drinks it coz (because) she has no idea of what they put inside of her drink. Whatever  
279 they put inside of your drink, drugs you and you become easily influenced into doing  
280 anything that they want you to do.”

281 Male, 15-17 years old, not sexually active.

282  
283 Poverty and the need for financial support were highlighted as other factors influencing the  
284 decision to engage in risky behaviours.

285 “Sometimes what leads some adolescents to sexual activities is that you get that at  
286 home they are in need of something so the girls get forced to turn to older men for  
287 financial support...which leads them to sexual activities.” Female, 18-19 years old,  
288 sexually active, single with multiple partners.

289  
290 “They take them to be “stupid” ... than they end up falling in that trap, and again...  
291 Sometimes you get {that} the young girls hang out with us older men, and we give  
292 them money.” Male caregiver, 46-50 years old, married.

293

294 **Relationship level factors influencing sexual decision-making**

295 Female adolescents believed a female caregiver, being the same gender would identify with  
296 them. In contrast, some female adolescents shared their greater comfort in communicating  
297 with their male caregiver. Others expressed comfort in talking with siblings.

298 *“I prefer to talk to my mother... [she] is a woman, and she will understand.”* Female,  
299 18-19 years old, sexually active, in a single partner relationship.

300

301 *“I honestly speaking I trust my father and I can talk to him about anything... We have*  
302 *a very close relationship. My mother can't keep a secret, but my father can.”* Female,  
303 18-19 years old, sexually active, in a single partner relationship.

304

305 *“Sister. I cannot to talk to my mother or my father.”* Female, 18-19 years old, sexually  
306 active, in a single partner relationship.

307

308 Female caregivers described how the role of a male caregiver or a father figure can create  
309 barriers to communication between adolescents and caregivers. Female caregivers believed  
310 that male caregivers ignored their supportive role in favour of fulfilling personal desires. In  
311 contrast, male caregivers may feel it is futile to reach out to sons because sons tend to  
312 develop closer bonds with female caregivers.

313 *“...is just that in most cases men are ignorant... he comes home tired, reads*  
314 *newspaper, watch news and sleeps... or is at the gym. I am the one that is always with*  
315 *the children”.* Female caregiver, 41-45 years old, married.

316

317 *“With fathers it is not that easy... even if they are boys they are close to their mothers*  
318 *[agreement by other caregivers]... they are even scared to talk to us... ”.* Male  
319 caregiver, 46-50 years old, married.

320

321 While caregivers expressed their desire to support their children, many adolescents were  
322 resistant to this type of engagement due to concerns citing trust, confidentiality, and feelings  
323 of being misunderstood. Male adolescents expressed difficulty in speaking with both male  
324 and female caregivers, fearing caregiver judgemental attitudes and being misunderstood.

325

326 *“We must be open... We have to be free but not too much right? We have to try to talk*  
327 *to them... our parents did not talk to us... So nowadays, we have to... teach the right*  
328 *things”*. Female caregiver, 46-50 years old, married.

329

330 *“I do not talk with them, because they are going to think that you have already started*  
331 *having sex at a young age.”* Male, 15-17 years old, not sexually active.

332

333 *“I do not talk to them because like they won’t understand what I’m going through”*.  
334 Male, 15-17 years old, not sexually active.

335

336 However, some caregivers and adolescents avoided discussions on sexual behaviour due to  
337 the historically taboo nature of talking about sex or other sensitive topics with minors.

338 *“Our parents were hiding things from us, we ... just lived in the dark. Today if you*  
339 *tell a child something, they will say “yes in your times”. So, we should find a balance*  
340 *and not put too much pressure... We must try to keep up with their times.”* Female  
341 caregiver, 46-50 years old, married.

342

343 *“...according to my culture at my age I cannot talk to my parents about sex...I*  
344 *prefer to talk to my friend because she broke her virginity before me, and she never*

345 *told me to do the same. I decided to break my virginity. When she gives me advice, I*  
346 *will listen and see for myself if it is right or wrong.*” Female, 18-19 years old,  
347 sexually active with a single partner.

348

349 Adolescents and caregivers expressed interest in improving communication on sexual  
350 activity and engaging in risky sexual behaviour discussions, to improve sexual decision-  
351 making. Some caregivers shared techniques they were able to use to improve communication.

352 *“I think there should be a study for parents, and they should be educated on how to*  
353 *communicate with their kids... they still have that mentality of saying you cannot talk*  
354 *about sex with your child”.* Female, 18-19 years old, sexually active, and in multi-  
355 partner relationships.

356

357 *“... when a child wants to talk to you, they must not be scared to talk to you... must*  
358 *have a friendship... for example I hugged my child and told her that it is a mistake... I*  
359 *am trying to bring her close to me... I do not shout ... The child must not be afraid to*  
360 *talk to you as the parent”.* Female caregiver, 46-50 years old, married.

361

## 362 **Discussion**

363

364 Making good choices is the foundation for healthy sexual decision-making. Through our  
365 qualitative investigation conducted in South Africa, we found that adolescents had adequate  
366 knowledge of sexual behaviour but do not translate this knowledge into healthy choices. In  
367 this resource-limited setting, poor communication between adolescents and caregivers  
368 emerged as a dominant barrier that limited the type of support that caregivers could provide  
369 to their adolescents to help them with healthy decision-making. While caregivers knew of the



370 benefits of communicating and supporting their adolescents to make healthy sexual decisions,  
371 they doubted their communication ability. Communication tools and guidance on how  
372 adolescents and caregivers could communicate about sensitive matters could create enabling  
373 environments for adolescents to make informed, healthy decisions regarding their risky  
374 sexual behaviours. This study supports previous reports highlighting the importance and  
375 strengthening of caregiver engagement with adolescents in healthy sexual decision-making,  
376 providing a supportive attitude, being able to monitor adolescent behaviour, and improving  
377 family dynamics where both caregivers serve important roles to protect adolescents from  
378 engaging high-risk sexual behaviours (11–14,19,26).

379

380 Adolescents and caregivers had contrasting views on their ability to communicate about  
381 sexual topics. Some reflected on the healthy relationships they had built in supportive roles.  
382 Others believed this was simply not possible or uncommon practice due to the traditional  
383 taboo nature in discussing sexual topics with children. Adolescents expressed limited  
384 caregiver trust, caregiver judgemental attitudes and being misunderstood as common barriers  
385 in engaging with caregivers. Caregivers knew the benefits of being more supportive but felt  
386 helpless as they lacked the knowledge and ability to engage in sexual behaviour discussions  
387 with their adolescents. Similar findings have been reported, amplifying the need  
388 strengthening caregiver intervention (12–14,27). A South African study identified that  
389 increased positive caregiving and caregiving supervision were protective factors to adolescent  
390 engaging in HIV risk behaviours (28). Further, caregiver support could enhance adolescent  
391 self-efficacy and improve self-esteem toward healthy sexual decision-making (19).

392

393 The lack of support from male caregivers within the family was another factor contributing to  
394 a breakdown in communication. The role male caregivers provide is increasingly being

395 challenged, shifting from the stereotypical breadwinner role, to being supportive and  
396 understanding toward their adolescent children (13,14,29). Other male caregivers, including  
397 uncles, brothers, grandfathers, or other adult males also have an important supportive role to  
398 serve (29). In our study, male caregivers desired to provide more support to their adolescents  
399 yet seemed insecure in this role. Reframing the stereotypical male caregiver role, towards  
400 empowering men to be understanding and supportive toward their children could address this  
401 barrier (26,29). Given adolescent boys expressing a lack in reaching out to either male or  
402 female caregiver, amplifies the need to intervene for adolescent boys to improving healthy  
403 decision-making.

404

405 An intention-behaviour gap where translating knowledge on sexual behaviour to making  
406 healthy sexual decisions was another key barrier (30). While adolescents have various  
407 knowledge resources, their knowledge does not always translate to healthy sexual decision-  
408 making. Using gain-framed messages to emphasize the benefits of engaging in certain  
409 behaviours could aid in healthy choices (31). Reaching adolescents through television and  
410 social media (32), has potential in propagating gain-framed messaging through these media to  
411 motivate healthy sexual decision choices. This strategy is widely becoming accepted and has  
412 been demonstrated to be successful in reducing sexually transmitted infections (31,33). Using  
413 television and social media could be beneficial in providing accurate information for both  
414 adolescents and caregivers, augmenting future adolescent-caregiver interventions in the  
415 promotion of healthy sexual decision-making (32).

416

417 Our study was limited to participants who were already accessing services as participants in a  
418 research setting, and an unequal representation of both male adolescents and caregivers. We  
419 also did not include the perspectives of external stakeholders such as community leaders,

420 policy makers, and potential influential role models within the community. Thus, this study is  
421 restricted in its ability to capture the perspectives of the broader community, including other  
422 adolescents and caregivers, and the findings should be considered within this limited scope.

423

424 Despite these limitations, our study has strengths in that it highlights how vital caregiver-  
425 adolescent communication could be in informing healthy sexual decision-making among  
426 adolescents who are at high-risk for HIV. This study is among a few studies highlighting the  
427 perspectives of adolescents and their caregivers that influences adolescent sexual decision-  
428 making and provides valuable insights into strategies that could be applied in future  
429 adolescent behavioural interventions.

430

## 431 **Conclusions**

432 This qualitative study uses a person-centred approach, and provides valuable insights into the  
433 individual and interpersonal factors influencing adolescent sexual decision-making in  
434 Rustenburg, South Africa. The study highlights the critical role of caregiver-adolescent  
435 communication in promoting healthy sexual decision-making. The findings underscore the  
436 importance of implementing targeted, culturally relevant interventions that address the  
437 barriers to effective communication between adolescents and caregivers. Interventions should  
438 include a sexual education and skill package to equip both male and female caregivers to  
439 engage in conversations on sexual behaviour. The study as well highlights the potential in  
440 including gain-framed messaging within intervention packages to address the intention-  
441 behaviour gap, enabling adolescents to translate knowledge towards healthy sexual choices.

442

## 443 Acknowledgements

444 We thank the study participants, and the staff at The Aurum Institute Rustenburg Clinical  
445 Research Site for expert implementation of the main study. Specifically, Ireen Mosweu for  
446 coordinating the recruitment and retention activities, and Octavia Madikwe for her clinical  
447 insights.

448

## 449 References

- 450 1. UNAIDS. The path that ends AIDS: UNAIDS Global AIDS Update 2023 [Internet].  
451 2023 [cited 2023 Nov 15]. Available from:  
452 <https://www.unaids.org/en/resources/presscentre/pressreleaseandstatementarchive/2023/july/unaids-global-aids-update>  
453
- 454 2. Simbayi L, Zuma K, Zungu N, Moyo S, Marinda E, Jooste S, et al. South African  
455 National HIV Prevalence, Incidence, Behaviour and Communication Survey, 2017  
456 [Internet]. Pretoria; 2019. Available from:  
457 [http://www.hsrc.ac.za/en/departments/saph/HAST\\_National\\_HIV\\_Survey](http://www.hsrc.ac.za/en/departments/saph/HAST_National_HIV_Survey)
- 458 3. UNAIDS. Women and HIV — A spotlight on adolescent girls and young women  
459 [Internet]. 2019 [cited 2022 Aug 1]. Available from:  
460 <https://www.unaids.org/en/resources/documents/2019/women-and-hiv>
- 461 4. UNAIDS. HIV prevention among adolescent girls and young women [Internet]. 2016.  
462 Available from:  
463 [https://www.unaids.org/sites/default/files/media\\_asset/UNAIDS\\_HIV\\_prevention\\_among\\_adolescent\\_girls\\_and\\_young\\_women.pdf](https://www.unaids.org/sites/default/files/media_asset/UNAIDS_HIV_prevention_among_adolescent_girls_and_young_women.pdf)  
464
- 465 5. UNAIDS. Young people and HIV [Internet]. 2021 [cited 2022 Aug 2]. Available from:  
466 [https://www.unaids.org/sites/default/files/media\\_asset/young-people-and-hiv\\_en.pdf](https://www.unaids.org/sites/default/files/media_asset/young-people-and-hiv_en.pdf)

- 467 6. Kanyemba R, Govender K, Dzomba A, Mashamba TP, Mantell JE. HIV Focused  
468 Sexual Risk-Reduction Interventions Targeting Adolescent Boys and Young Men in  
469 Sub-Saharan Africa: A Scoping Review. *AIDS Behav.* 2023 Oct 1;27(10):3356–91.
- 470 7. Rousseau E, Katz AWK, O'Rourke S, Bekker LG, Delany-Moretlwe S, Bukusi E, et  
471 al. Adolescent girls and young women's PrEP-user journey during an implementation  
472 science study in South Africa and Kenya. *PLoS One.* 2021 Oct 1;16(10 October).
- 473 8. Montgomery ET, Browne EN, Atujuna M, Boeri M, Mansfield C, Sindelo S, et al.  
474 Long-Acting Injection and Implant Preferences and Trade-Offs for HIV Prevention  
475 among South African Male Youth. *J Acquir Immune Defic Syndr (1988).* 2021 Jul  
476 1;87(3):928–36.
- 477 9. Minnis AM, Atujuna M, Browne EN, Ndwiyana S, Hartmann M, Sindelo S, et al.  
478 Preferences for long-acting Pre-Exposure Prophylaxis (PrEP) for HIV prevention  
479 among South African youth: results of a discrete choice experiment. 2020; Available  
480 from: <http://onlinelibrary.wiley.com/doi/10.1002/jia2.25528/full>
- 481 10. Hartmann M, Minnis AM, Krogstad E, Ndwiyana S, Sindelo S, Atujuna M, et al.  
482 iPrevent: Engaging youth as long-acting HIV prevention product co-researchers in  
483 Cape Town, South Africa. *African Journal of AIDS Research.* 2021;20(4):277–86.
- 484 11. Spanier GB. SEXUAL SOCIALIZATION: A CONCEPTUAL REVIEW SEXUAL  
485 SOCIALIZATION: A CONCEPTUAL REVIEW\* [Internet]. Vol. 7, Source:  
486 International Journal of Sociology of the Family. [cited 2024 May 4]. Available from:  
487 <https://www.jstor.org/stable/23028433>
- 488 12. Duby Z, Verwoerd W, Isaksen K, Jonas K, Maruping K, Dietrich J, et al. 'I can't go to  
489 her when I have a problem': sexuality communication between South African  
490 adolescent girls and young women and their mothers. *Sahara J.* 2022;19(1):8–21.

- 491 13. Usonwu I, Ahmad R, Curtis-Tyler K. Parent–adolescent communication on adolescent  
492 sexual and reproductive health in sub-Saharan Africa: a qualitative review and  
493 thematic synthesis. Vol. 18, Reproductive Health. BioMed Central Ltd; 2021.
- 494 14. Agbeve AS, Fiaveh DY, Anto-Ocrah M. Parent-Adolescent Sexuality Communication  
495 in the African Context: A Scoping Review of the Literature. Vol. 10, Sexual Medicine  
496 Reviews. Elsevier B.V.; 2022. p. 554–66.
- 497 15. Zuma T, Seeley J, Hlongwane S, Chimbindi N, Sherr L, Floyd S, et al. A socio-  
498 ecological approach to understanding experiences and perceptions of a multilevel HIV  
499 prevention intervention: The determined, resilient, empowered, AIDS-free, mentored,  
500 and safe (DREAMS) partnership in uMkhanyakude, KwaZulu-Natal, South Africa.  
501 SSM - Qualitative Research in Health. 2022 Dec 1;2.
- 502 16. Ojukwu EN, Okoye HU, Saewyc E. Social Correlates of HIV-Risky Behaviours  
503 among African Canadian Adolescents Living in British Columbia, Canada: A  
504 Secondary Data Analysis. Int J Environ Res Public Health. 2023 Jun 1;20(11).
- 505 17. Härkönen U. The Bronfenbrenner ecological systems theory of human development  
506 [Internet]. 2007 [cited 2024 Feb 15]. Available from:  
507 [https://d1wqtxts1xzle7.cloudfront.net/78412107/Bronfenbrenner\\_in\\_\\_20English\\_07\\_sent-libre.pdf?1641737060=&response-content-disposition=inline%3B+filename%3DThe\\_Bronfenbrenner\\_ecological\\_systems\\_th.pdf&Expires=1708007572&Signature=Fivmlyz6Ue3-QM~RoQr8H1d7p~UWWVtZp6aXYVtQMFLrFJfkAnLNU9doFLnUbksq~OzFthKHByZUi9z467XI7eRGFkIi7xSWnYp0hAELLJ2pgeAKafDnvivapmrwrVb7nA1Ab512b513slbHJ1OhPCEdYLEF9qEZXJnbBvdH-zfQAtRM1ZBLjgIarPI0p2Kh~wqY3d0O4~69iwiV8F9LHjrvTggnqlbLtZ6sP9CU0Fgb0R2pq0Pos1I5ftonerG093~aEjOC~edv3qjdg9swVqA6Ynqse~~jVaMkQTH1g~Kf4m](https://d1wqtxts1xzle7.cloudfront.net/78412107/Bronfenbrenner_in__20English_07_sent-libre.pdf?1641737060=&response-content-disposition=inline%3B+filename%3DThe_Bronfenbrenner_ecological_systems_th.pdf&Expires=1708007572&Signature=Fivmlyz6Ue3-QM~RoQr8H1d7p~UWWVtZp6aXYVtQMFLrFJfkAnLNU9doFLnUbksq~OzFthKHByZUi9z467XI7eRGFkIi7xSWnYp0hAELLJ2pgeAKafDnvivapmrwrVb7nA1Ab512b513slbHJ1OhPCEdYLEF9qEZXJnbBvdH-zfQAtRM1ZBLjgIarPI0p2Kh~wqY3d0O4~69iwiV8F9LHjrvTggnqlbLtZ6sP9CU0Fgb0R2pq0Pos1I5ftonerG093~aEjOC~edv3qjdg9swVqA6Ynqse~~jVaMkQTH1g~Kf4m)

- 516 KNDhLAOzPVOD5RkPgfDwfWnpwIl-fJX9xeWRx5x7I8w\_\_&Key-Pair-  
517 Id=APKAJLOHF5GGSLRBV4ZA
- 518 18. Claussen C, Matejko E, Exner-Cortens D. Exploring risk and protective factors for  
519 adolescent dating violence across the social-ecological model: A systematic scoping  
520 review of reviews. Vol. 13, *Frontiers in Psychiatry*. Frontiers Media S.A.; 2022.
- 521 19. DiClemente RJ, Salazar LF, Crosby RA. A review of STD/HIV preventive  
522 interventions for adolescents: Sustaining effects using an ecological approach. Vol. 32,  
523 *Journal of Pediatric Psychology*. 2007. p. 888–906.
- 524 20. Statistics South Africa. STATS SA. 2023 [cited 2023 Dec 22]. Census 2022. Available  
525 from: <https://census.statssa.gov.za/#/province/6/2>
- 526 21. Kamali A, Price MA, Lakhi S, Karita E, Inambao M, Sanders EJ, et al. Creating an  
527 African HIV clinical research and prevention trials network: HIV prevalence,  
528 incidence and transmission. *PLoS One* [Internet]. 2015;10(1):1–19. Available from:  
529 <http://dx.doi.org/10.1371/journal.pone.0116100>
- 530 22. Massyn N, Barron P, Day C, Ndlovu N, Padarath A. District Health Barometer 2018-  
531 19 [Internet]. Health Systems Trust. Durban, South Africa; 2020. Available from:  
532 [https://www.hst.org.za/publications/District Health  
533 Barometers/District+Health+Barometer+2018-19+Web.pdf](https://www.hst.org.za/publications/District Health<br/>533 Barometers/District+Health+Barometer+2018-19+Web.pdf)
- 534 23. Price MA, Kuteesa M, Oladimeji M, Brumskine W, Edward V, Makkan H, et al. High  
535 STI burden among a cohort of adolescents aged 12–19 years in a youth-friendly clinic  
536 in South Africa. Mudzviti T, editor. *PLoS One* [Internet]. 2024 Jul 10;19(7):e0306771.  
537 Available from: <https://dx.plos.org/10.1371/journal.pone.0306771>
- 538 24. Lumivero. NVivo Version 14.

- 539 25. Tong A, Sainsbury P, Craig J. Consolidated criteria for reporting qualitative research  
540 (COREQ): A 32-item checklist for interviews and focus groups. *International Journal*  
541 *for Quality in Health Care*. 2007 Dec;19(6):349–57.
- 542 26. Berg W van den, Makusha T, Richter L, Rabe M, Ratele K, Nduna M, et al. The state  
543 of South Africa’s fathers, 2018 [Internet]. *Sonke Gender Justice*; 2018 [cited 2023 Dec  
544 22]. Available from: [https://genderjustice.org.za/publication/state-of-south-africas-](https://genderjustice.org.za/publication/state-of-south-africas-fathers-2018/)  
545 [fathers-2018/](https://genderjustice.org.za/publication/state-of-south-africas-fathers-2018/)
- 546 27. Ndugga P, Kwagala B, Wandera SO, Kisaakye P, Mbonye MK, Ngabirano F. “If your  
547 mother does not teach you, the world will...”: a qualitative study of parent-adolescent  
548 communication on sexual and reproductive health issues in Border districts of eastern  
549 Uganda. *BMC Public Health*. 2023 Dec 1;23(1).
- 550 28. Rudgard WE, Saminathen MG, Orkin M, Banougnin BH, Shenderovich Y, Toska E.  
551 Protective factors for adolescent sexual risk behaviours and experiences linked to HIV  
552 infection in South Africa: a three-wave longitudinal analysis of caregiving, education,  
553 food security, and social protection. *BMC Public Health*. 2023 Dec 1;23(1):1452.
- 554 29. Kim S, Jemmott JB, Icard LD, Zhang J, Jemmott LS. South African Fathers  
555 Involvement and Their Adolescents’ Sexual Risk Behavior and Alcohol Consumption.  
556 *AIDS Behav*. 2021 Sep 1;25(9):2793–800.
- 557 30. Conner M, Norman P. Understanding the intention-behavior gap: The role of intention  
558 strength. Vol. 13, *Frontiers in Psychology*. Frontiers Media S.A.; 2022.
- 559 31. Macapagal K, Janssen E, Matson M, Finn PR, Heiman JR. The Impact of Gain- and  
560 Loss-Framed Messages on Young Adults’ Sexual Decision Making: An Experimental  
561 Study. *Arch Sex Behav*. 2017 Feb 1;46(2):385–94.
- 562 32. Gabarron E, Wynn R. Use of social media for sexual health promotion: A scoping  
563 review. *Glob Health Action*. 2016;9(1).



564 33. Gilbert G, Williamson C, Richards J, Collyer TA, Kelly P. Do framed mental health  
565 messages on social media influence university students' motivation for physical  
566 activity? Int J Environ Res Public Health. 2021 Aug 2;18(16).

567

## 568 **Supporting Information**

569 S1: FGD Guide Adolescents

570 S2: FGD Guide Caregivers

571 S3: Consolidated Criteria for Reporting Qualitative Research (COREQ), 32-item checklist

572

## 573 **Financial disclosure statement**

574 This work was funded by IAVI and the United States Agency for International Development  
575 (USAID). The full list of IAVI donors is available at <http://www.iavi.org>. The contents of  
576 this manuscript are the responsibility of the authors and do not necessarily reflect the views  
577 of USAID or the US Government.

578

## 579 **Declarations**

580 **Ethics approval:** Human research ethics approval to conduct this study was granted by the  
581 University of the Witwatersrand, Human Research Ethics Committee (ref. no 170607).

582 **Consent to participate:** All participants provided informed consent. Those under 18 years of  
583 age provided assent and their caregivers provided consent.

584 **Consent for publication:** Participants provided consent (and assent in the case of minors) to  
585 publish findings anonymously with the understanding their confidentiality will be protected.

586 **Conflicts of interest/Competing interests:** Authors have none to declare.

587

## 588 **Abbreviations**

|            |        |                                                                |
|------------|--------|----------------------------------------------------------------|
| <b>589</b> | ABYM   | Adolescent boys and young men                                  |
| <b>590</b> | AGYW   | Adolescent girls and young women                               |
| <b>591</b> | BMI    | Body mass index                                                |
| <b>592</b> | DREAMS | Determined, Resilient, Empowered, AIDS free, Mentored and Safe |
| <b>593</b> | FGD    | Focus group discussion                                         |
| <b>594</b> | HIV    | Human immunodeficiency virus                                   |
| <b>595</b> | IQR    | Interquartile range                                            |
| <b>596</b> | STI    | Sexually transmitted infection                                 |
| <b>597</b> | SEM    | Socioecological model                                          |
| <b>598</b> | SSA    | sub-Saharan African                                            |
| <b>599</b> | USD    | U.S. dollar                                                    |
| <b>600</b> | ZAR    | South African rand                                             |
